# Supplementary material for: Convergent evolution of pathogenicity islands in helper cos phage interference
Source: PubMed Central journal article supplement (PMC5052747; doi:10.1098/rstb.2015.0505), 2016-11-05
Supplement: rstb20150505supp1.pdf [file rstb20150505supp1.pdf]

**Philosophical Transactions B.**

Doi: 10.1098/rstb.2015.0505

**Supplemental Information**

**Convergent evolution of pathogenicity islands in helper *cos* phage  
interference**

Nuria Carpena, Keith A. Manning, Terje Dokland, Alberto Marina, José R Penadés.

**Table S1. Bacterial strains used in this study.**

| Strains | Description                                                                       | Reference |
|---------|-----------------------------------------------------------------------------------|-----------|
| RN4220  | Restriction-defective derivative of RN450                                         | [1]       |
| RN451   | RN450 lysogenic for $\phi$ 11                                                     | [2]       |
| RN10359 | RN450 lysogenic for $\phi$ 80 $\alpha$                                            | [3]       |
| JP10435 | RN4220 lysogenic for $\phi$ 12                                                    | [2]       |
| JP12520 | RN4220 lysogenic for $\phi$ 12 evolved 1                                          | This work |
| JP12521 | RN4220 lysogenic for $\phi$ 12 evolved 2                                          | This work |
| JP12522 | RN4220 lysogenic for $\phi$ 12 evolved 3                                          | This work |
| JP12523 | RN4220 lysogenic for $\phi$ 12 evolved 4                                          | This work |
| JP5011  | RN4220 lysogenic for $\phi$ SLT <i>pvl::tetM</i>                                  | [4]       |
| JP9108  | JP5011 $\phi$ SLT <i>pvl::tetM</i> $\Delta$ ORF42                                 | [5]       |
| LUG1170 | SH1000 $\phi$ SLT                                                                 | [6]       |
| JP11194 | LUG1170 SaPIbov5 <i>vwb::tetM</i> original                                        | [5]       |
| JP11010 | JP10435 SaPIbov5 <i>vwb::tetM</i> original                                        | [5]       |
| JP12942 | JP12523 SaPIbov5 <i>vwb::tetM</i> original                                        | This work |
| JP12684 | JP10435 SaPIbov5 <i>vwb::tetM</i> evolved                                         | This work |
| JP11425 | LUG1170 SaPIbov5 <i>vwb::tetM</i> evolved                                         | This work |
| JP12685 | LUG1170 SaPIbov5:: <i>ermC</i> adjusted                                           | This work |
| JP11634 | RN4220 SaPIbov5:: <i>ermC</i> adjusted                                            | This work |
| JP13161 | RN4220 SaPIbov5:: <i>ermC</i> adjusted ORF8 mutant                                | This work |
| JP12648 | RN4220 SaPIbov5:: <i>ermC</i> adjusted ORF9 mutant                                | This work |
| JP13048 | RN4220 SaPIbov5:: <i>ermC</i> adjusted ORF10 mutant                               | This work |
| JP13087 | RN4220 SaPIbov5:: <i>ermC</i> adjusted ORF11 mutant                               | This work |
| JP12618 | RN4220 SaPIbov5:: <i>ermC</i> adjusted ORF12 mutant                               | This work |
| JP13192 | RN4220 SaPIbov5:: <i>ermC</i> adjusted ORF8 to12 mutant                           | This work |
| JP12419 | JP10435 SaPIbov5:: <i>ermC</i> adjusted                                           | This work |
| JP13171 | JP10435 SaPIbov5:: <i>ermC</i> adjusted ORF8 mutant                               | This work |
| JP12688 | JP10435 SaPIbov5:: <i>ermC</i> adjusted ORF9 mutant                               | This work |
| JP13162 | JP10435 SaPIbov5:: <i>ermC</i> adjusted ORF10 mutant                              | This work |
| JP13110 | JP10435 SaPIbov5:: <i>ermC</i> adjusted ORF11 mutant                              | This work |
| JP12636 | JP10435 SaPIbov5:: <i>ermC</i> adjusted ORF12 mutant                              | This work |
| JP13298 | JP10435 SaPIbov5:: <i>ermC</i> adjusted ORF8 to 12 mutant                         | This work |
| JP13443 | JP13298 pJP1769                                                                   | This work |
| JP11905 | JP5011 SaPIbov5:: <i>ermC</i> adjusted                                            | This work |
| JP11906 | JP5011 $\phi$ SLT <i>pvl::tetM</i> $\Delta$ ORF42 SaPIbov5:: <i>ermC</i> adjusted | This work |

| Strains | Description                                       | Reference |
|---------|---------------------------------------------------|-----------|
| JP12736 | JP10435 SaPI <sub>bov5</sub> :: <i>ermC</i> small | This work |
| JP12867 | JP12523 SaPI <sub>bov5</sub> :: <i>ermC</i> small | This work |
| JP12686 | LUG1170 SaPI <sub>bov5</sub> :: <i>ermC</i> small | This work |
| JP12380 | RN4220 pCN51                                      | This work |
| JP12945 | RN4220 pJP1749                                    | This work |
| JP12800 | RN4220 pJP1748                                    | This work |
| JP12968 | RN4220 pJP1747                                    | This work |
| JP11423 | RN4220 pJP1730                                    | This work |
| JP12647 | RN4220 pJP1745                                    | This work |
| JP11367 | JP5011 pCN51                                      | [5]       |
| JP11559 | JP5011 pJP1730                                    | This work |
| JP12293 | RN10359 pCN51                                     | This work |
| JP11556 | RN10359 pJP1730                                   | This work |
| JP12343 | RN451 pCN51                                       | This work |
| JP11557 | RN451 pJP1730                                     | This work |
| JP12294 | JP10435 pCN51                                     | This work |
| JP13006 | JP10435 pJP1749                                   | This work |
| JP13007 | JP10435 pJP1748                                   | This work |
| JP13008 | JP10435 pJP1747                                   | This work |
| JP11558 | JP10435 pJP1730                                   | This work |
| JP13009 | JP10435 pJP1745                                   | This work |
| JP13012 | JP12523 pCN51                                     | This work |
| JP13013 | JP12523 pJP1749                                   | This work |
| JP13014 | JP12523 pJP1748                                   | This work |
| JP13015 | JP12523 pJP1747                                   | This work |
| JP13016 | JP12523 pJP1730                                   | This work |
| JP13017 | JP12523 pJP1745                                   | This work |

**Table S2. Plasmids used in this study.**

| Plasmid                | Description                                                                                              | Reference   |
|------------------------|----------------------------------------------------------------------------------------------------------|-------------|
| pBT <sub>2</sub> -βgal | Vector for efficient allelic replacement                                                                 | Lab plasmid |
| pJP1712                | pBT <sub>2</sub> -βgal derivative, insertion of the <i>ermC</i> cassette in SaPIbov5 <sup>adjusted</sup> | This work   |
| pJP1761                | pBT <sub>2</sub> -βgal derivative, insertion of the <i>ermC</i> cassette in SaPIbov5 <sup>small</sup>    | This work   |
| pJP1757                | pBT <sub>2</sub> -βgal derivative, ochre mutation in SaPIbov5 ORF8                                       | This work   |
| pJP1758                | pBT <sub>2</sub> -βgal derivative, ochre mutation in SaPIbov5 ORF9                                       | This work   |
| pJP1759                | pBT <sub>2</sub> -βgal derivative, ochre mutation in SaPIbov5 ORF10                                      | This work   |
| pJP1717                | pBT <sub>2</sub> -βgal derivative, ochre mutation in SaPIbov5 ORF11                                      | This work   |
| pJP1760                | pBT <sub>2</sub> -βgal derivative, ochre mutation in SaPIbov5 ORF12                                      | This work   |
| pCN51                  | Derivative of pCN51. Expression vector                                                                   | [7]         |
| pJP1749                | pCN51- <i>ppi</i> SaPIbov5                                                                               | This work   |
| pJP1748                | pCN51- <i>orf9</i> SaPIbov5                                                                              | This work   |
| pJP1747                | pCN51- <i>orf10</i> SaPIbov5                                                                             | This work   |
| pJP1730                | pCN51- <i>ccm</i> SaPIbov5                                                                               | This work   |
| pJP1745                | pCN51- <i>orf12</i> SaPIbov5                                                                             | This work   |
| pCN51                  | Derivative of pCN51 with chloramphenicol cassette. Expression vector                                     | This work   |
| pJP1769                | pCN51- <i>cat194-ccm</i> SaPIbov5                                                                        | This work   |

**Table S3. Primers used in this study.**

| Plasmid                      | Oligonucleotides  | Sequence (5'-3')                                |
|------------------------------|-------------------|-------------------------------------------------|
| pJP1712                      | SaPIbov5-29mE     | CCGGAATT <u>CG</u> CATAATGACTACCGCATTAG         |
|                              | SaPIbov5-30cB     | CGCGGATCCATTTTTTCATTACCATTAAATAAATTTATATACCTG   |
|                              | SaPIbov5-31mPst1  | AAC <u>TGC</u> CAGAAATTAATAAGGTGTATAACGGTAAATAG |
|                              | SaPIbov5-32sEcoR5 | AAGATAT <u>CG</u> TAAATCATAACATAAAAGCACCCC      |
| pJP1761                      | SaPIbov5-57mE     | CCGGAATT <u>CT</u> ATGTAAAGGTGTGGTTATTTGG       |
|                              | SaPIbov5-58cB     | CGCGGATCCCTATGAAAGTTCTTTTTTAACTTGT              |
|                              | SaPIbov5-59mPst1  | AAC <u>TGC</u> CAGGTTATGATATGTTATACATGCATCA     |
|                              | SaPIbov5-60cEcoR5 | AAGATAT <u>CA</u> ATGAAATAAGTATTTTTTCGTTAGTTTG  |
| pJP1757                      | SaPIbov5-90mB     | CGCGGATCCTTCAGTCACACCTATAAACTG                  |
|                              | SaPIbov5-91c      | TTTGAATTCTTGTTCTTAAAATACATT                     |
|                              | SaPIbov5-92m      | AATGTATTTTAAGAACAAGAATTCAAA                     |
|                              | SaPIbov5-93cS     | ACGCGT <u>CG</u> ACTCATTGTATGATCTAGCACGTC       |
| pJP1758                      | SaPIbov5-78mB     | CGCGGATCCGAAGAACTTGCAGTTACTCAAAA                |
|                              | SaPIbov5-75c      | GATTATTTGGAATTCGATTCTTTAATGATT                  |
|                              | SaPIbov5-76m      | AATCATTAAAGAATCGAATTCCAATAATC                   |
|                              | SaPIbov5-77cS     | ACGCGT <u>CG</u> ACAAAGTTAGATAGTTGGTACCCAA      |
| pJP1759                      | SaPIbov5-81mB     | CGCGGATCCAAGGTCTAAGGCTACCAATTGT                 |
|                              | SaPIbov5-94c      | TACGTTCTGTTGTTTTGAATTCTTCTTAGAACGAAATGTTA       |
|                              | SaPIbov5-95m      | TAACATTTCTGTTCTAAGAAGAATTCAAAACAACGAACGTA       |
|                              | SaPIbov5-96cS     | ACGCGT <u>CG</u> ACGATAGCTCAATACCATTAGTAGCTA    |
| pJP1717                      | SaPIbov5-97mB     | CGCGGATCCGTAAGGCGCTATACAAAAAAGC                 |
|                              | SaPIbov5-98c      | TCTCACTACTACTAAGAATTCCTGTTTATGTACCTACCCATG      |
|                              | SaPIbov5-99m      | CATGGGTAGGTACATAAACAGGAATTCCTTAGTGAGTAGTGAGA    |
|                              | SaPiBov5-100cS    | ACGCGT <u>CG</u> ACCAACAGATACTTTTCGTTAAACG      |
| pJP1760                      | SaPIbov5-65mB     | CGCGGATCCCGTTTAGACGAAAAGTATCTGT                 |
|                              | SaPIbov5-66c      | ATTGTAGAATTCTAAAAGTTCTACTTAAGTGATTTTATC         |
|                              | SaPIbov5-67m      | GATAAAATCACTTAAGTAGAACTTTTAGAATTCTACAAT         |
|                              | SaPIbov5-68cS     | ACGCGT <u>CG</u> ACTAACTCCTCATCTCCGTCC          |
| pJP1749                      | SaPIbov5-78mB     | CGCGGATCCGAAGAACTTGCAGTTACTCAAAA                |
|                              | SaPIbov5-87cXma1  | CCCCCGGGTTAATTTACTAACTAAATGTTACTG               |
| pJP1748                      | SaPIbov5-81mB     | CGCGGATCCAAGGTCTAAGGCTACCAATTGT                 |
|                              | SaPIbov5-82cE     | CCGGAATTCTCATTGTATGATCTAGCACGTC                 |
| pJP1747                      | SaPIbov5-80mB     | CGCGGATCCGTATAGATATGGGAGTGTGTATATT              |
|                              | SaPiBov5-88cXma1  | CCCCCGGGTTAACTCTTTCATAATCTTCATCTC               |
| pJP1730                      | SaPIbov5-54mB     | CGCGGATCCTTTCTTCATAACATTTCTGTTCTATGA            |
|                              | SaPIbov5-55cE     | CCGGAATTCTTATTTAACCTTAACGATTCTCAGTA             |
| pJP1745                      | SaPIbov5-64mB     | CGCGGATCCGCAACCGGATAAACTTTTATG                  |
|                              | SaPIbov5-56cE     | CCGGAATTCTATGAAAGTTCTTTTTTAACTTGT               |
| pJP1769                      | SaPIbov5-54mB     | CGCGGATCCTTTCTTCATAACATTTCTGTTCTATGA            |
|                              | SaPIbov5-55cE     | CCGGAATTCTTATTTAACCTTAACGATTCTCAGTA             |
| SaPIbov5 Southern blot probe | SaPIbov1-112mE    | CGCGGATCCTAATTCTCCACGTCTAAAGC                   |
|                              | SaPIbov1-113cB    | CCGGAATTCAATTGCTGAGGCAAACTTC                    |

**Table S4. Templates and confidence values in gp33 and Ccm models generated by Phyre2 server<sup>a</sup>.**

|                                        | Protein | Template information                                                    | PDB code | Aligned Residues <sup>a</sup> | Confidence <sup>b</sup> (%) | Identity (%) |
|----------------------------------------|---------|-------------------------------------------------------------------------|----------|-------------------------------|-----------------------------|--------------|
| C-terminal portion                     | gp33    | Capsid protein form bacteriophage HK97                                  | 2FT1     | 132-388                       | 100                         | 18           |
|                                        |         | Capsid protein form bacteriophage CW02                                  | 3J1A     | 211-388                       | 99.6                        | 25           |
|                                        |         | Capsid protein form bacteriophage BPP-1                                 | 3J4U     | 148-338                       | 98.2                        | 17           |
|                                        |         | <i>Thermotoga maritima</i> encapsulin protein (TM-0786)                 | 3DKT     | 147-392                       | 97.9                        | 15           |
|                                        |         | Capsid protein form bacteriophage T7                                    | 3J7W     | 135-387                       | 97.8                        | 15           |
|                                        |         | <i>Myxococcus xanthus</i> encapsulin protein (EncA)                     | 4PT2     | 147-388                       | 97.6                        | 11           |
|                                        |         | Capsid protein form marine bacteriophage Syn5                           | 4BML     | 144-387                       | 97.6                        | 15           |
|                                        |         | Virus-like particule from <i>Pyrococcus furiosus</i>                    | 2E0Z     | 147-392                       | 97.4                        | 9            |
|                                        | Ccm     | Capsid protein form bacteriophage HK9                                   | 2FT1     | 153-349                       | 99                          | 15           |
|                                        |         | Capsid protein form bacteriophage HK97                                  | 1IF0     | 159-349                       | 98.9                        | 14           |
|                                        |         | Capsid protein form bacteriophage HK97                                  | 3P8Q     | 153-341                       | 97.9                        | 15           |
|                                        |         | Capsid protein form bacteriophage CW02                                  | 3J1A     | 186-309                       | 76.8                        | 26           |
|                                        |         | Capsid protein form bacteriophage BPP-1                                 | 3J4U     | 234-299                       | 74.7                        | 20           |
| Capsid protein form bacteriophage HK97 |         | 2FT1                                                                    | 153-349  | 99                            | 15                          |              |
| N-terminal portion                     | gp33    | Coiled-Coil Protein of Unknown Function from <i>Eubacterium eligens</i> | 3HNW     | 19-84                         | 93.3                        | 12           |
|                                        |         | Human Fibrinogen beta chain                                             | 3GHG     | 17-87                         | 84.4                        | 19           |
|                                        |         | Anopheles Plasmodium-responsive Leucine-rich repeat protein 1 (LRR1)    | 3OJA     | 17-90                         | 84.3                        | 12           |
|                                        |         | Bovine Fibrinogen beta chain                                            | 1DEQ     | 20-91                         | 84.1                        | 13           |
|                                        |         | Human cytoplasmic dynein 2 heavy chain                                  | 4RH7     | 17-119                        | 83.6                        | 10           |
|                                        |         | PcsB protein from <i>Streptococcus pneumoniae</i>                       | 4CGK     | 17-82                         | 79.4                        | 13           |
|                                        |         | Seryl-tRNA synthetase N-terminal domain from <i>Aquifex aeolicus</i>    | 2DQ3     | 14-91                         | 78.8                        | 13           |
|                                        |         | dynein motor heavy chain                                                | 3VKG     | 1-84                          | 67.5                        | 5            |
|                                        | Ccm     | Mit domain-containing protein 1                                         | 2YMB     | 109-157                       | 14.9                        | 20           |
|                                        |         | Human Striatin-3 coiled coil domain                                     | 4N6J     | 31-47                         | 14.8                        | 35           |

<sup>a</sup>See reference [8] for details.

<sup>b</sup>Aligned residues. Part of protein sequence that is aligned with the template sequence.

<sup>c</sup>Confidence represents the probability (from 0 to 100) that the match between the query sequence and the corresponding template is a true homology. A match with confidence >90%, generally should indicate that the query sequence adopts the overall fold shown by the template and that the core of the protein is modelled at high accuracy.

**Table S5. Templates and confidence values in gp33 and Ccm models generated by RaptorX server<sup>a</sup>.**

|                    | Protein | Template information                                              | PDB code | P-value <sup>b</sup> | Score <sup>c</sup> | uGDT/GDT <sup>d</sup> | uSeqID/SeqID <sup>e</sup> |
|--------------------|---------|-------------------------------------------------------------------|----------|----------------------|--------------------|-----------------------|---------------------------|
| C-terminal portion | gp33    | Capsid protein form bacteriophage HK97                            | 1OHG     | 3.1 e-08             | 149                | 147/57                | 42/16                     |
|                    |         | Capsid protein form bacteriophage HK97                            | 3QPR     | 2.1 e-05             | 99                 | 121/51                | 31/13                     |
|                    |         | Thermotoga maritima encapsulin protein (TM-0786)                  | 3DKT     | 1.5 e-04             | 83                 | 72/31                 | 27/12                     |
|                    |         | Myxococcus xanthus encpasulin protein (EncA)                      | 4PT2     | 3.0 e-04             | 78                 | 51/29                 | 10/6                      |
|                    |         | Virus-like particule from <i>Pyrococcus furiosus</i>              | 2E0Z     | 1.0 e-04             | 86                 | 60/27                 | 18/8                      |
|                    | Ccm     | Capsid protein form bacteriophage HK97                            | 1OHG     | 9.1 e-08             | 133                | 144/55                | 29/11                     |
|                    |         | Capsid protein form bacteriophage HK97                            | 3QPR     | 2.2 e-05             | 93                 | 94/47                 | 18/9                      |
|                    |         | Thermotoga maritima encapsulin protein (TM-0786)                  | 3DKT     | 5.9 e-05             | 85                 | 72/30                 | 26/11                     |
|                    |         | Myxococcus xanthus encpasulin protein (EncA)                      | 4PT2     | 2.3 e-04             | 75                 | 50/28                 | 12/7                      |
|                    |         | Virus-like particule from <i>Pyrococcus furiosus</i>              | 2E0Z     | 6.7 e-05             | 84                 | 56/26                 | 22/10                     |
| N-terminal portion | gp33    | Structural maintenance of chromosomes protein 4 (Smc4) from Yeast | 4RSI     | 1.1 e-02             | 61                 | 52/47                 | 13/12                     |
|                    |         | CT398 protein from <i>Chlamydia trachomatis</i>                   | 4ILO     | 1.0 e-02             | 62                 | 52/47                 | 12/11                     |
|                    |         | HP0958 Protein from <i>Helicobacter pylori</i>                    | 3NA7     | 1.1 e-02             | 60                 | 52/47                 | 18/16                     |
|                    |         | Colicin IA from <i>Escherichia coli</i>                           | 1CII     | 8.0 e-03             | 64                 | 41/43                 | 8/9                       |
|                    |         | Cytoplasmic dynein 1 heavy chain 1 from <i>Mus musculus</i>       | 3WUQ     | 9.9 e-03             | 62                 | 49/44                 | 15/14                     |
|                    | Ccm     | iSH2 domain of human phosphatidylinositol 3-kinase p85beta        | 3MTT     | 2.7 e-02             | 28                 | 42/53                 | 10/12                     |
|                    |         | Vacuolar protein sorting-associated protein 30                    | 5DFZ     | 1.8 e-02             | 30                 | 42/52                 | 8/10                      |
|                    |         | PcsB protein from <i>Streptococcus pneumoniae</i>                 | 4CGK     | 2.9 e-02             | 27                 | 42/52                 | 10/12                     |
|                    |         | HP0958 Protein from <i>Helicobacter pylori</i>                    | 3NA7     | 2.9 e-02             | 28                 | 42/52                 | 8/10                      |
|                    |         | Autophagy protein Apg17                                           | 4HPQ     | 3.1 e-02             | 27                 | 41/53                 | 5/6                       |

<sup>a</sup>See reference [9] for details.

<sup>b</sup>P-value. Likelihood of a predicted model being worse than the best of a set of randomly-generated models. For mainly alpha proteins, P-value < e-3 and e-4 are good indicator for mainly alpha and beta proteins, respectively.

<sup>c</sup>Score. The alignment score falling between 0 and the (domain) sequence length, with 0 indicating the worst.

<sup>d</sup>uSeqID and SeqID. uSeqID is the number of identical residues in the alignment. SeqID is uSeqID normalized by the protein (or domain) sequence length and multiplied by 100.

<sup>e</sup>uGDT and GDT. uGDT is the unnormalized GDT (Global Distance Test) score defined as  $1 * N(1) + 0.75 * N(2) + 0.5 * N(4) + 0.25 * N(8)$ , where  $N(x)$  is the number of residues with estimated modeling error (in Å) smaller than  $x$ . GDT is calculated as uGDT divided by the protein (or domain) length and multiplied by a 100.

**Table S6. Effect of SaPIbov5 size on phage and SaPI titres<sup>a</sup>.**

| Donor strain  |                              |                          |                         |
|---------------|------------------------------|--------------------------|-------------------------|
| Phage         | SaPI                         | Phage titre <sup>b</sup> | SaPI titre <sup>c</sup> |
| φ12           | -                            | 1.9 x 10 <sup>10</sup>   | -                       |
| φ12           | SaPIbov5 <sup>original</sup> | 2.0 x 10 <sup>5</sup>    | 3.09 x 10 <sup>5</sup>  |
| φ12           | SaPIbov5 <sup>evolved</sup>  | 1.9 x 10 <sup>6</sup>    | 6.8 x 10 <sup>6</sup>   |
| φ12           | SaPIbov5 <sup>adjusted</sup> | 3.3 x 10 <sup>6</sup>    | 1.33 x 10 <sup>7*</sup> |
| φ12           | SaPIbov5 <sup>small</sup>    | 1.5 x 10 <sup>6</sup>    | 1.8 x 10 <sup>6</sup>   |
| φ12 evolved 4 | -                            | 9.2 x 10 <sup>9</sup>    | -                       |
| φ12 evolved 4 | SaPIbov5 <sup>original</sup> | 1.2 x 10 <sup>6</sup>    | 2.4 x 10 <sup>4</sup>   |
| φ12 evolved 4 | SaPIbov5 <sup>adjusted</sup> | 4.7 x 10 <sup>6</sup>    | 1.1 x 10 <sup>7*</sup>  |
| φ12 evolved 4 | SaPIbov5 <sup>small</sup>    | 5.4 x 10 <sup>6</sup>    | 1.3 x 10 <sup>6</sup>   |
| φ SLT         | -                            | 6.6 x 10 <sup>7</sup>    | -                       |
| φ SLT         | SaPIbov5 <sup>original</sup> | 8.2 x 10 <sup>5</sup>    | 7.5 x 10 <sup>3</sup>   |
| φ SLT         | SaPIbov5 <sup>evolved</sup>  | 1.0 x 10 <sup>6</sup>    | 1.16 x 10 <sup>6*</sup> |
| φ SLT         | SaPIbov5 <sup>adjusted</sup> | 1.1 x 10 <sup>6</sup>    | 2.7 x 10 <sup>6*</sup>  |
| φ SLT         | SaPIbov5 <sup>small</sup>    | 8.2 x 10 <sup>5</sup>    | 1.7 x 10 <sup>5</sup>   |

<sup>a</sup>The means of results from three independent experiments are shown. Variation was within ±5% in all cases.

<sup>b</sup>PFU/ml induced culture, using RN4220 as recipient strain

<sup>c</sup>No. of transductants/ml induced culture, using RN4220 as recipient strain.

\*Significant at p<0.05, using Kruskal-Wallis with Dunn's Multiple Comparison Test probabilities.



**Table S7. Role of Ccm in phage interference.**

**Phage infection**

| Phage                 | No. phage plaques      |                                         |
|-----------------------|------------------------|-----------------------------------------|
|                       | RN4220 <sup>b</sup>    | RN4220 + pCN51- <i>ccm</i> <sup>b</sup> |
| 80α                   | 2.0 x 10 <sup>12</sup> | 8.0 x 10 <sup>12</sup>                  |
| φ11                   | 5.2 x 10 <sup>11</sup> | 1.6 x 10 <sup>12</sup>                  |
| φ12                   | 2.8 x 10 <sup>10</sup> | 1.4 x 10 <sup>7</sup>                   |
| φSLT <i>pvl::tetM</i> | 8.8 x 10 <sup>6</sup>  | 1.0 x 10 <sup>2</sup>                   |

**Phage induction**

| Donor Strain          |                   | Phage titre            |
|-----------------------|-------------------|------------------------|
| Lysogen               | Plasmid           | RN4220 <sup>b</sup>    |
| 80α                   | pCN51             | 7.0 x 10 <sup>10</sup> |
| 80α                   | pCN51- <i>ccm</i> | 1.0 x 10 <sup>10</sup> |
| φ11                   | pCN51             | 5.0 x 10 <sup>9</sup>  |
| φ11                   | pCN51- <i>ccm</i> | 1.4 x 10 <sup>9</sup>  |
| φ12                   | pCN51             | 1.8 x 10 <sup>10</sup> |
| φ12                   | pCN51- <i>ccm</i> | 1.1 x 10 <sup>6</sup>  |
| φSLT <i>pvl::tetM</i> | pCN51             | 1.7 x 10 <sup>5</sup>  |
| φSLT <i>pvl::tetM</i> | pCN51- <i>ccm</i> | 6.0 x 10 <sup>2</sup>  |

<sup>a</sup>The means of results from three independent experiments are shown. Variation was within ±5% in all cases.

<sup>b</sup>PFU/ml induced culture, using RN4220 as recipient strain.

## References

1. Kreiswirth, B. N., Löfdahl, S., Betley, M. J., O'Reilly, M., Schlievert, P. M., Bergdoll, M. S. & Novick, R. P. 1983 The toxic shock syndrome exotoxin structural gene is not detectably transmitted by a prophage. *Nature* **305**, 709–712.
2. Novick, R. 1967 Properties of a cryptic high-frequency transducing phage in *Staphylococcus aureus*. *Virology* **33**, 155–166.
3. Ubeda, C., Barry, P., Penadés, J. R. & Novick, R. P. 2007 A pathogenicity island replicon in *Staphylococcus aureus* replicates as an unstable plasmid. *Proc. Natl. Acad. Sci. U.S.A.* **104**, 14182–14188. (doi:10.1073/pnas.0705994104)
4. Ferrer, M. D. et al. 2011 RinA controls phage-mediated packaging and transfer of virulence genes in Gram-positive bacteria. *Nucleic Acids Res.* **39**, 5866–5878. (doi:10.1093/nar/gkr158)
5. Quiles-Puchalt, N., Carpena, N., Alonso, J. C., Novick, R. P., Marina, A. & Penadés, J. R. 2014 Staphylococcal pathogenicity island DNA packaging system involving *cos*-site packaging and phage-encoded HNH endonucleases. *Proc. Natl. Acad. Sci. U.S.A.* **111**, 6016–6021. (doi:10.1073/pnas.1320538111)
6. Labandeira-Rey, M. et al. 2007 *Staphylococcus aureus* Panton-Valentine leukocidin causes necrotizing pneumonia. *Science* **315**, 1130–1133. (doi:10.1126/science.1137165)
7. Charpentier, E., Anton, A. I., Barry, P., Alfonso, B., Fang, Y. & Novick, R. P. 2004 Novel cassette-based shuttle vector system for gram-positive bacteria. *Appl. Environ. Microbiol.* **70**, 6076–6085. (doi:10.1128/AEM.70.10.6076-6085.2004)
8. Kelley, L. A., Mezulis, S., Yates, C. M., Wass, M. N. & Sternberg, M. J. E. 2015 The Phyre2 web portal for protein modeling, prediction and analysis. *Nat Protoc* **10**, 845–858. (doi:10.1038/nprot.2015.053)
9. Källberg, M., Wang, H., Wang, S., Peng, J., Wang, Z., Lu, H. & Xu, J. 2012 Template-based protein structure modeling using the RaptorX web server. *Nat Protoc* **7**, 1511–1522. (doi:10.1038/nprot.2012.085)

```

phiSLT      tatgccccctgcccacggcttaaaatgttttttcgccgggtaccgggagaggcccaaac
phi12       tatagccccctacccatcggcttaaaatgttttttcgacgggtaccggcgggggcccttc
SaPIbov5    tatagccccctgcccacggcttaaaatgttttttcgccgggtaccggcgggggcccttc
***. *****.*****.***** ***** *.* ** *

phiSLT      gctagcaacgcgataaaattttcatgaaagggg
phi12       gcttgcaacgcgataaaactttt-atgaaagggg
SaPIbov5    gcttgcaacgcgataaaactttt-atgaaagggg
*** *****.**** *****

```

**Figure S1. Cos alignment.** The SaPIbov5 and phage *cos* sites and their flanking sequences are aligned using MUSCLE. The *cos* sites are shaded in yellow.

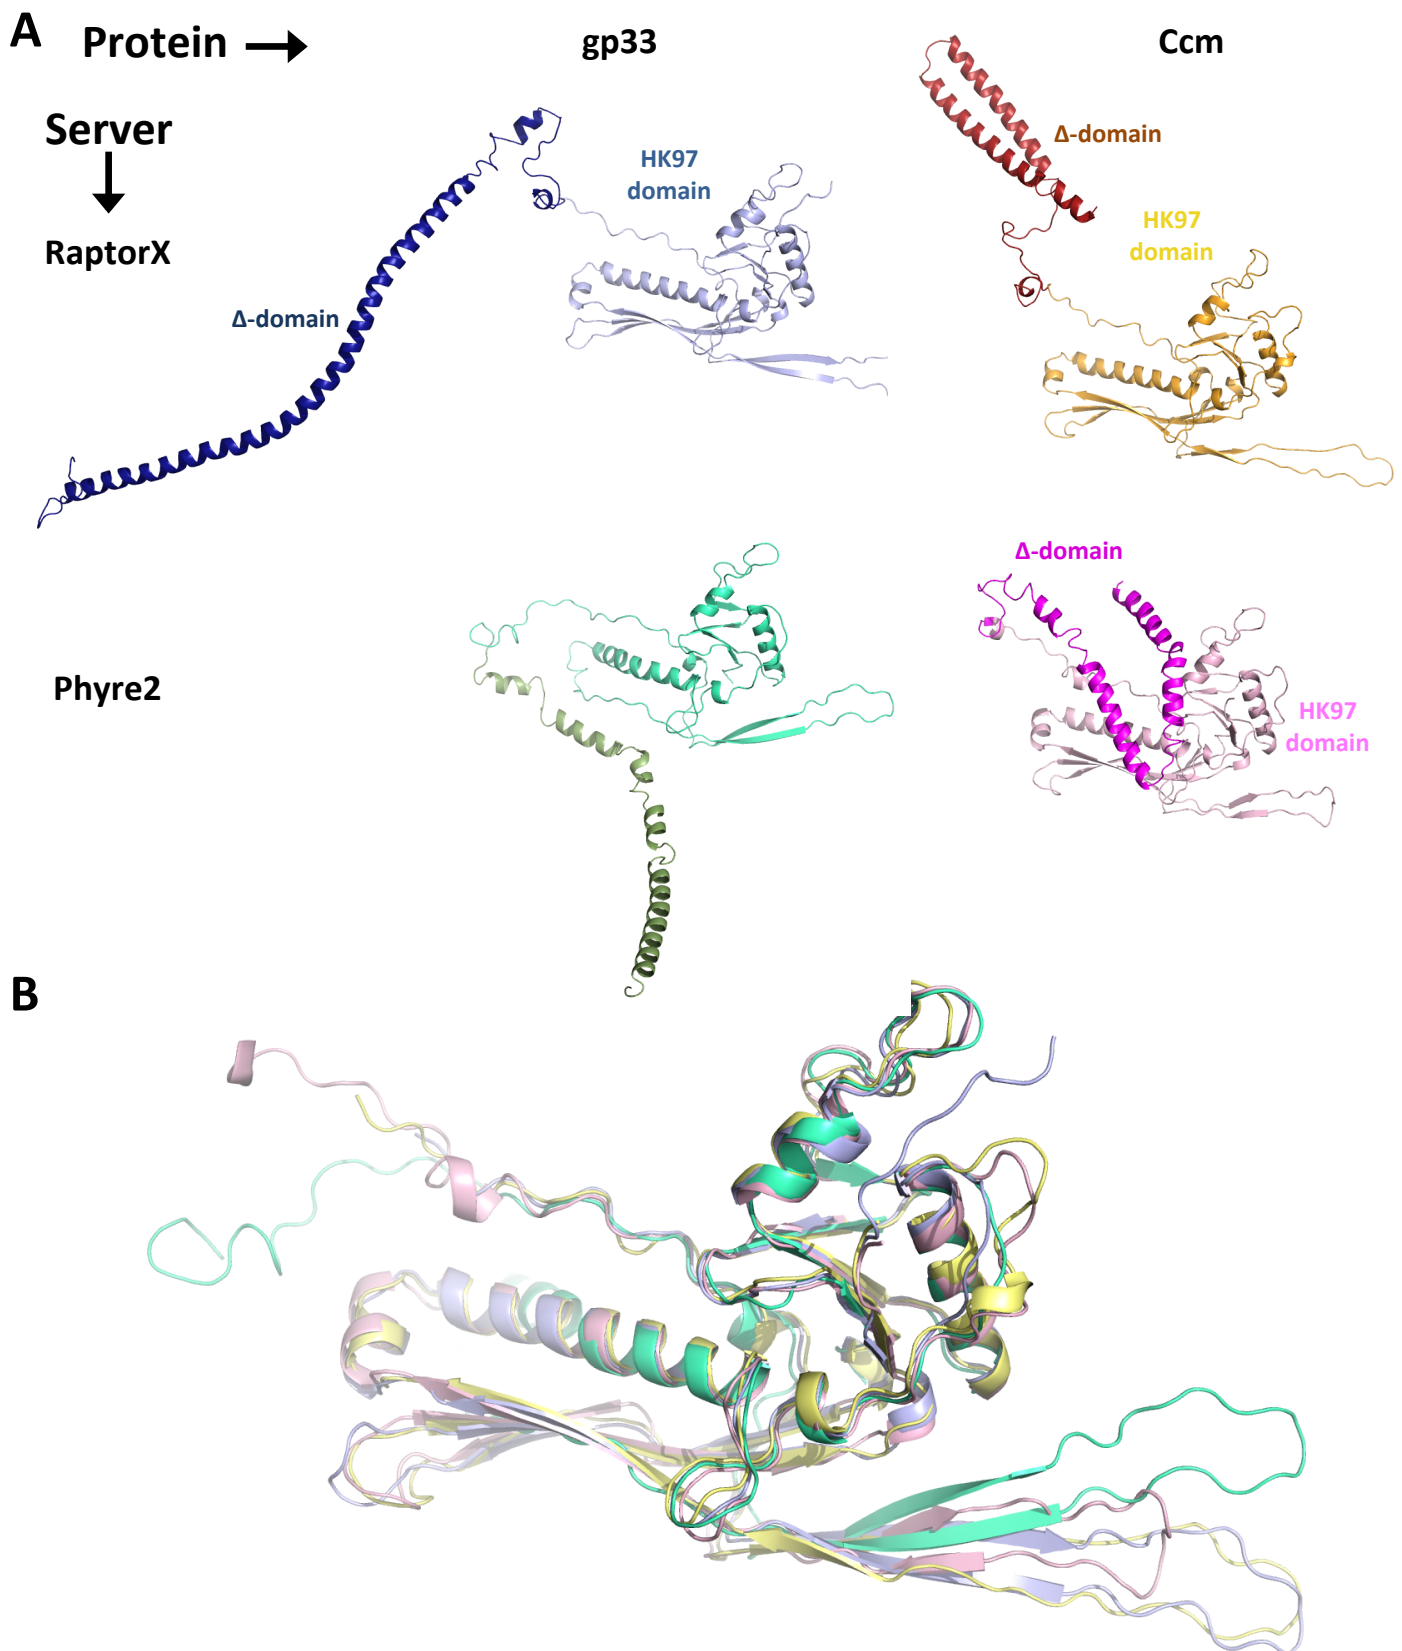

**Figure S2. Comparison of gp33 and Ccm structural models generated by RaptorX and Phyre2 Servers.** (a) Cartoon representation of the structural models of gp33 and Ccm proteins produced by RaptorX and Phyre2 servers (see material and methods for details). Both servers divided the proteins into two portions: a N-terminal portion (highlighted in dark hue) with high  $\alpha$ -helical content characteristic of coat protein  $\Delta$ -domains and a C-terminal portion (light hues) showing the HK97-fold. (b) Superimposition of C-terminal portions for the four models (two for each protein). The four models (identical colours than A) agree in that gp33 and Ccm present an structural similar C-terminal portion with HK97-fold.



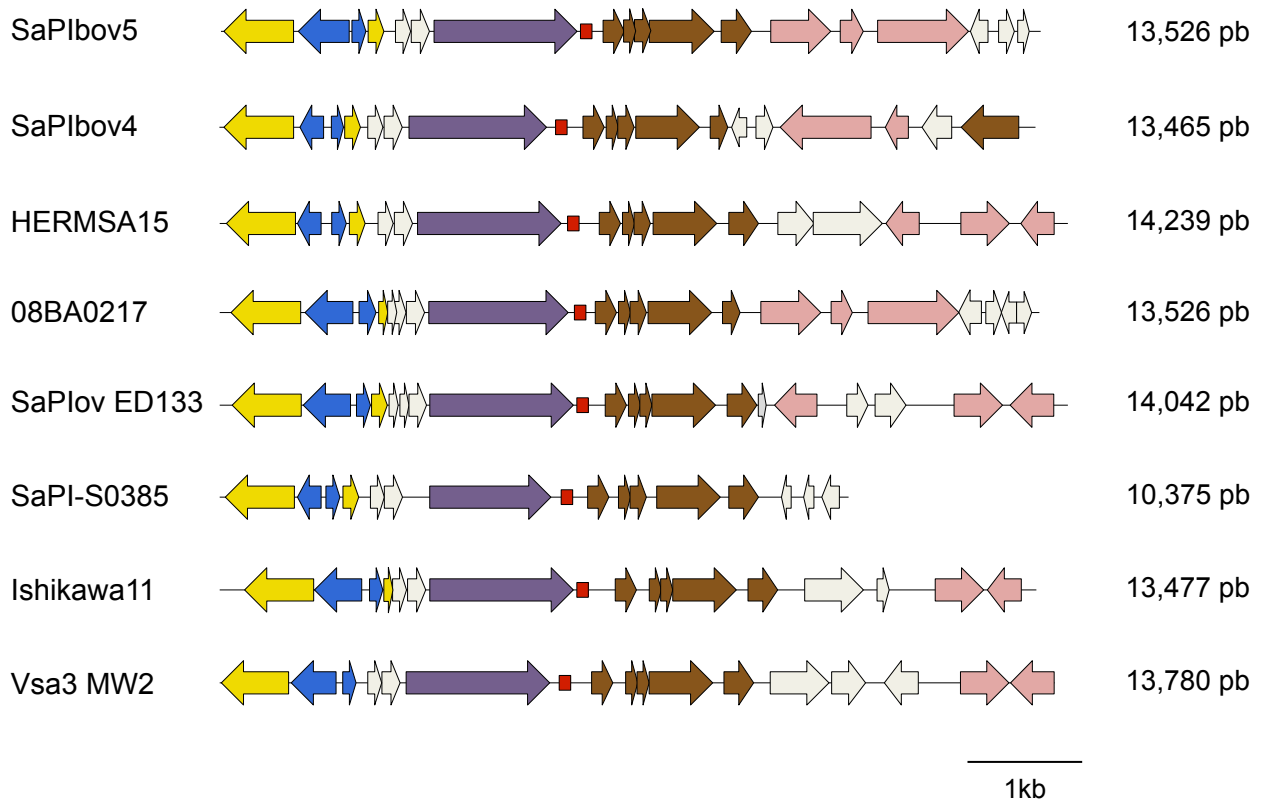

**Figure S4. Comparison of a subset of phage-inducible chromosomal island genomes.** Genomes are aligned according to the prophage convention, with the integrase gene (*int*) at the left end. Genes are colored according to their sequence and function: *int* and *xis* (excisionase) are yellow; SaPI transcription regulators (*stl*, *str*) are blue; the replication genes primase (*pri*) and replication initiator (*rep*) are purple; the replication origin (*ori*), red; genes of the new morphogenetic operon are brown; superantigen and other virulence genes are pink. Genes encoding hypothetical proteins are white.
